# Supplementary material for: Spatiotemporal Analysis of Future Drought Vulnerability in the Hindu Kush Region: A Case Study of the Karnali River Basin
Source: Research Square preprint supplement (doi:10.21203/rs.3.rs-5240619/v1), 2024-11-10

**Table 1: Selected CMIP Six GCMs**

| SN | GCMs | Horizontal Resolution | Temporal  Resolution | Country | Research Center |
| --- | --- | --- | --- | --- | --- |
| 1 | ACCESS-CM2 | 1.9° × 1.3° | 1 day | Australia | Australian Community Climate and Earth System Simulator |
| 2 | EC-Earth3-Veg | 0.7° × 0.7° | Europe | European Community Earth |
| 3 | MIROC6 | 1.4° × 1.4° | Japan | National Institute for Environmental Studies, Japan Agency for Marine-Earth Science and Technology, Atmosphere and Ocean Research Institute, RIKEN Center |
| 4 | MPI-ESM1-2-LR | 1.9° × 1.9° | Germany | Max Planck Institute for Meteorology |
| 5 | MRI-ESM2-0 | 1.1° × 1.1° | Germany | Meteorological Research Institute |
| 6 | NESM3 |  | China | Nuist Earth System Model version 3 |
| 7 | NorESM2-LM |  | Norway | Norwegian Climate Center |
| 8 | NorESM2-MM | 0.9° × 1.25° | Norway | Norwegian Climate Center |
| 9 | EC-Earth3 | 0.7° × 0.7° | Europe | European Community Earth |
| 10 | MPI_ESM1-2-HR | 0.9° × 0.9° |  | Max Planck Institute for Meteorology |

**Table 2: Quantile Mapping for the Bias Correction**

| S No | Quantile Mapping Method for Bias Correction |
| --- | --- |
| 1 | **Distribution-based Quantile Mapping (Only for Precipitation):** |
| 1.1 | Bernoulli-Gamma distribution |
| 1.2 | Bernoulli-Weibull distribution |
| 1.3 | Bernoulli-Lognormal distribution |
| 1.4 | Bernoulli-Exponential distribution |
|  |  |
| 2 | **Parametric Transformation:** |
| 2.1 | Power transfer function |
| 2.2 | Exponential-asymptotic transfer function |
| 2.3 | Linear transfer function |
| 2.4 | Scaling transfer function |
|  |  |
| 3 | **Non-Parametric Transformation:** |
| 3.1 | Empirical quantiles with linear interpolation |
| 3.2 | Empirical quantiles with tri-cubic interpolation |
| 3.3 | Robust empirical quantiles with linear interpolation |
| 3.4 | Robust empirical quantiles with tri-cubic interpolation |
| 3.5 | Smoothing Spline Quantile Mapping |

**Table 3: Precipitation Ranking under SSP245**

| S No | Pre-Monsoon | | | Monsoon | | | Post-Monsoon | | | Winter | | | Vulnerability |
| --- | --- | --- | --- | --- | --- | --- | --- | --- | --- | --- | --- | --- | --- |
| **NF** | **MF** | **FF** | **NF** | **MF** | **FF** | **NF** | **MF** | **FF** | **NF** | **MF** | **FF** |
| 1 | < 37 | <43 | <31 | 440-620 | <690 | <740 | <23 | <35 | <39 | <59 | <31 | <28 | **Very High** |
| 2 | 37-48 | 43-48 | 31-36 | 620-735 | 690-830 | 740-882 | 23-28 | 35-40 | 39-43 | 59-67 | 31-35 | 28-35 | **High** |
| 3 | 48-57 | 48-53 | 36-42 | 750-835 | 830-953 | 882-998 | 28-34 | 40-44 | 43-47 | 67-73 | 35-39 | 35-38 | **Moderate** |
| 4 | 57-71 | 53-59 | 42-51 | 835-965 | 953-1097 | 998-1154 | 34-43 | 44-52 | 47-53 | 73-80 | 39-43 | 38-42 | **Less** |
| 5 | 71> | 59> | 51> | 965> | 1097> | 1154> | 43> | 52> | 53> | 80> | 43> | 42> | **Very Less** |

**Table 4: Temperature Ranking under SSP245**

| **S No** | **Pre-Monsoon** | | | **Monsoon** | | | **Post-Monsoon** | | | **Winter** | | | **Vulnerability** |
| --- | --- | --- | --- | --- | --- | --- | --- | --- | --- | --- | --- | --- | --- |
| **NF** | **MF** | **FF** | **NF** | **MF** | **FF** | **NF** | **MF** | **FF** | **NF** | **MF** | **FF** |
| 1 | <26 | <27 | <28 | <28 | <30 | <31 | <24 | <25 | <25 | <19 | <20 | <21 | **Very Less** |
| 2 | 26-28 | 27-29 | 28-29 | 28-29 | 30-31 | 31-32 | 24-26 | 25-27 | 25-27 | 19-20 | 20-22 | 21-22 | **Less** |
| 3 | 28-30 | 29-31 | 29-31 | 29-30 | 31-32 | 32-33 | 26-27 | 27-28 | 27-28 | 20-22 | 22-23 | 22-23 | **Moderate** |
| 4 | 30-32 | 31-33 | 31-34 | 30-32 | 32-34 | 33-35 | 27-29 | 28-30 | 28-30 | 22-23 | 23-25 | 23-25 | **High** |
| 5 | 32> | 33> | 34> | 32> | 34> | 35> | 29> | 30> | 30> | 23> | 25> | 25> | **Very High** |

**Table 5: Precipitation Ranking under SSP585**

| S No | Pre-Monsoon | | | Monsoon | | | Post-Monsoon | | | Winter | | | Vulnerability |
| --- | --- | --- | --- | --- | --- | --- | --- | --- | --- | --- | --- | --- | --- |
| **NF** | **MF** | **FF** | **NF** | **MF** | **FF** | **NF** | **MF** | **FF** | **NF** | **MF** | **FF** |
| 1 | <49 | <67 | <20 | <686 | <753 | <817 | <31 | <16 | <36 | <47 | <38 | <44 | **Very High** |
| 2 | 49-56 | 67-73 | 20-25 | 686-820 | 753-904 | 817-958 | 31-36 | 16-19 | 36-41 | 47-53 | 38-43 | 44-50 | **High** |
| 3 | 56-62 | 73-82 | 25-30 | 820-920 | 904-1025 | 958-1066 | 36-41 | 19-22 | 41-46 | 53-58 | 43-47 | 50-55 | **Moderate** |
| 4 | 62-73 | 82-96 | 30-36 | 920-1064 | 1025-1179 | 1066-1215 | 41-48 | 22-26 | 46-52 | 58-65 | 47-54 | 55-65 | **Less** |
| 5 | 73> | 96> | 36> | 1064> | 1179> | 1215> | 48> | 26> | 52> | 65> | 54> | 65> | **Very Less** |

**Table 6: Temperature Ranking under SSP585**

| S No | Pre-Monsoon | | | Monsoon | | | Post-Monsoon | | | Winter | | | Vulnerability |
| --- | --- | --- | --- | --- | --- | --- | --- | --- | --- | --- | --- | --- | --- |
| **NF** | **MF** | **FF** | **NF** | **MF** | **FF** | **NF** | **MF** | **FF** | **NF** | **MF** | **FF** |
| 1 | <26 | <29 | <28 | <29 | <30 | <32 | <25 | <25 | <27 | <17 | <20 | <22 | **Very Less** |
| 2 | 26-28 | 29-31 | 28-30 | 29-31 | 30-31 | 32-33 | 25-26 | 25-27 | 27-29 | 17-19 | 20-22 | 22-23 | **Less** |
| 3 | 28-29 | 31-32 | 30-32 | 31-32 | 31-32 | 33-34 | 26-28 | 27-28 | 29-30 | 19-20 | 22-23 | 23-25 | **Moderate** |
| 4 | 29-32 | 32-35 | 32-35 | 32-34 | 32-34 | 34-36 | 28-29 | 28-30 | 30-32 | 20-22 | 23-25 | 25-26 | **High** |
| 5 | 32> | 35> | 35> | 34> | 34> | 36> | 29> | 30> | 32> | 22> | 25> | 26> | **Very High** |

**Table 6: Questionnaire Response**

| **Layers** | **Importance of Layers in %** | | | | | | | | **Range %** | **Priority /**  **Ranking** |
| --- | --- | --- | --- | --- | --- | --- | --- | --- | --- | --- |
| **1** | **2** | **3** | **4** | **5** | **6** | **7** | **8** |
| **Precipitation** | 100 |  |  |  |  |  |  |  | 100 | **1** |
| **Temperature** | 20 | 60 | 20 |  |  |  |  |  | 20-60 | **2** |
| **Land Use Land Cover** |  |  | 40 | 20 | 20 | 20 |  |  | 20-40 | **3** |
| **Drainage Density** |  |  | 20 | 40 | 20 | 20 |  |  | 20-40 | **4** |
| **Soil Type** |  |  |  | 60 | 40 |  |  |  | 40-60 | **4** |
| **Slope** |  |  |  | 20 | 60 | 20 |  |  | 20-60 | **5** |
| **Elevation Band** | 20 |  | 20 |  | 20 | 40 |  |  | 20-40 | **6** |
| **Aspects** |  |  | 20 |  | 20 |  | 60 | 20 | 20-60 | **7** |

**Table 7: Comparison Matrix**


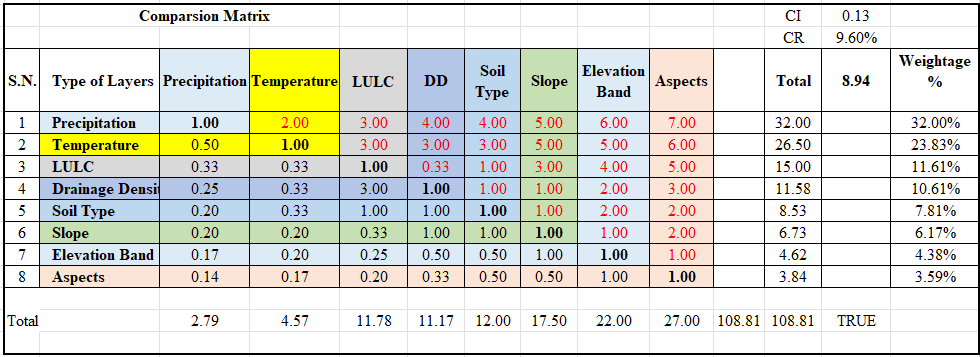


**Table 8: Normalized Matrix**


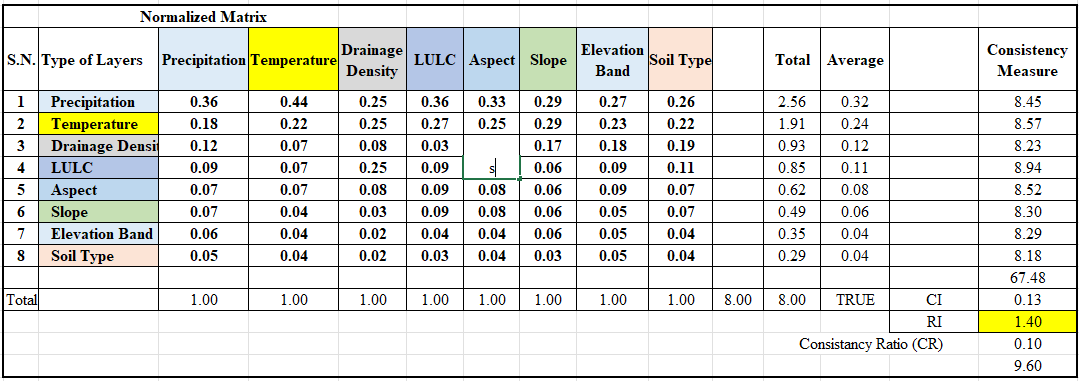

Supplement: Supplementary file 1 [file 3f56f071d6d4442f26037d68.docx]
